# Supplementary material for: Engineering surface functional groups on mesoporous silica: towards a humidity-resistant hydrophobic adsorbent
Source: Royal Society of Chemistry journal article supplement (doi:10.1039/c8ta04082f), 2018-01-01
Supplement: c8ta04082f1.pdf [file c8ta04082f1.pdf]

## **Engineering Surface Functional Groups on Mesoporous Silica:**

### **Towards a Humidity-Resist Hydrophobic Adsorbent**

Shuai Liu<sup>a</sup>, Yue Peng<sup>\*a</sup>, Jianjun Chen<sup>a</sup>, Wenbo Shi<sup>b</sup>, Tao Yan<sup>a</sup>, Bing Li<sup>a</sup>, Yani Zhang<sup>a</sup>,  
and Junhua Li<sup>\*a</sup>

<sup>a</sup> State Key Joint Laboratory of Environment Simulation and Pollution Control, School of Environment, Tsinghua University, Beijing 100084, China

<sup>b</sup> Department of Chemical and Environmental Engineering, Yale University, New Haven, CT, USA

Tel.: +86 10 62771093, Fax: +86 10 62771093

E-mail: pengyue83@tsinghua.edu.cn, lijunhua@tsinghua.edu.cn

#### **Supplementary Information for Journal of Materials Chemistry A**

1 page, including 1 figure.

Page 1 includes **Fig. S1**, which is referred to directly in the text.

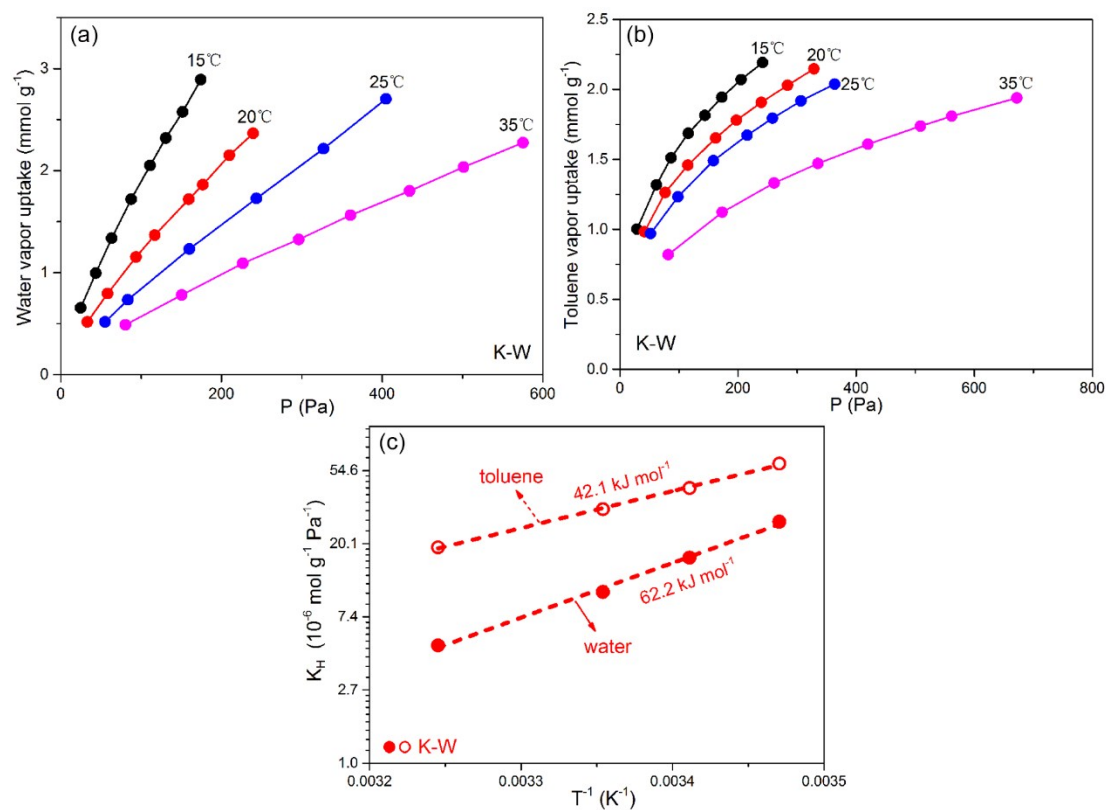

**Fig. S1.** The static adsorption isotherms for water (a) and toluene (b) over K-W, and the Arrhenius plots for the calculation of adsorption heat over K-W (c).
